# Supplementary material
Source: HighWire-hosted journal article supplement (http://jpet.aspetjournals.org/highwire/filestream/142255/field_highwire_adjunct_files/0/248153SupplData.pdf)
Supplement: 248153SupplData.pdf [file 248153SupplData.pdf]

**Supplementary Data**

**The Journal of Pharmacology and Experimental Therapeutics (JPET)**

TAS05567, a Novel Potent and Selective Spleen Tyrosine Kinase Inhibitor, Abrogates

Immunoglobulin-Mediated Autoimmune and Allergic Responses in Rodent Models

Hiroaki Hayashi, Ryusuke Kaneko, Shunsuke Demizu, Daichi Akasaka, Manabu

Tayama, Takafumi Harada, Hiroki Irie, Yoshio Ogino, Naoko Fujino, and Eiji Sasaki

**Results****Table S1. Selectivity profile of TAS05567 and R406 for kinase from the Profiler Pro Kit.**

| Enzyme                       | TAS0556<br>7<br>% inh at<br>50 nM | R406 %<br>inh at<br>500 nM | Enzyme           | TAS05567<br>% inh at 50<br>nM | R406<br>% inh<br>at 500<br>nM | Enzyme                     | TAS055<br>67<br>% inh at<br>50 nM | R406<br>% inh<br>at 500<br>nM |
|------------------------------|-----------------------------------|----------------------------|------------------|-------------------------------|-------------------------------|----------------------------|-----------------------------------|-------------------------------|
| ABL                          | 1                                 | 20                         | EPHB3            | 2                             | 25                            | NuaK1                      | 31                                | 87                            |
| Abl(H396P)                   | -11                               | -3                         | EPHB4            | 2                             | 21                            | p38a                       | 2                                 | 27                            |
| Abl(Q252H)                   | -17                               | -7                         | Erk1             | -1                            | 14                            | p38alpha/SAPK2a<br>(T106M) | -11                               | -4                            |
| Abl(T315I)                   | -55                               | -36                        | Erk2             | 3                             | 30                            | p38-beta2                  | -2                                | 13                            |
| ABL1(E255K)                  | -15                               | -6                         | Fer              | 55                            | 96                            | p38-delta                  | 4                                 | 36                            |
| ABL1(G250E)                  | -16                               | -7                         | FES              | 2                             | 27                            | p38-gamma                  | -1                                | 14                            |
| ABL1(Y253F)                  | -12                               | -5                         | FGFR1            | -3                            | 11                            | p70S6K                     | 0                                 | 17                            |
| AKT1                         | 13                                | 68                         | FGFR1<br>(V561M) | -19                           | -16                           | PAK2                       | 1                                 | 20                            |
| AKT2                         | 0                                 | 17                         | FGFR2            | 2                             | 24                            | PAK3                       | 9                                 | 56                            |
| AKT3                         | -1                                | 14                         | FGFR2(N549<br>H) | -18                           | -8                            | PAK4                       | 77                                | 100                           |
| ALK                          | 62                                | 99                         | FGFR3            | -3                            | 9                             | PAK5 (PAK7)                | 80                                | 100                           |
| AMPK                         | 3                                 | 29                         | FGFR3<br>[K650E] | -18                           | -14                           | PASK                       | -5                                | 2                             |
| AMPK-alpha2/<br>beta1/gamma1 | 0                                 | 17                         | FGFR4            | -5                            | 3                             | PDGFR beta                 | -1                                | 15                            |
| Arg                          | -3                                | 9                          | FGR              | -7                            | 1                             | PDGFR_alpha                | 4                                 | 32                            |
| AurA                         | 10                                | 63                         | FLT1             | -5                            | 4                             | PDGFRA (D842V)             | -9                                | 0                             |
| AurB                         | 2                                 | 23                         | FLT3             | 17                            | 73                            | PDGFR-alpha(V56<br>1D)     | -10                               | -2                            |
| AurC                         | -5                                | 4                          | Flt3(D835Y)      | -8                            | 1                             | PhKg1                      | -2                                | 12                            |
| AXL                          | 1                                 | 20                         | FLT4             | 4                             | 33                            | PhKg2                      | -3                                | 11                            |
| BLK                          | 27                                | 86                         | FMS              | -2                            | 13                            | PIM1                       | -4                                | 6                             |
| BMX                          | 11                                | 65                         | FRK              | 23                            | 83                            | PIM2                       | 56                                | 97                            |
| BRSK1                        | -4                                | 7                          | FYN              | 34                            | 90                            | PIM3                       | 0                                 | 19                            |
| BRSK2                        | -1                                | 14                         | GCK              | 52                            | 93                            | PKA                        | 10                                | 60                            |

|                      |    |    |                        |     |     |                      |     |    |
|----------------------|----|----|------------------------|-----|-----|----------------------|-----|----|
| BTK                  | 25 | 85 | GSK3-alpha             | 8   | 53  | PKC-alpha            | 27  | 86 |
| CaMK1a               | -5 | 4  | GSK3b                  | 9   | 58  | PKCb2                | -5  | 3  |
| CamK1d               | -2 | 12 | Hck                    | 5   | 46  | PKC-beta1            | 18  | 73 |
| CAMK2                | 0  | 18 | HER4                   | 4   | 31  | PKC-delta            | -3  | 9  |
| CaMK2a               | 3  | 29 | HGK                    | 6   | 49  | PKC-epsilon          | 7   | 52 |
| CAMK4                | -2 | 12 | HIPK1                  | 3   | 29  | PKC-eta              | 8   | 55 |
| CaMKII_beta          | -6 | 2  | HIPK2                  | -1  | 14  | PKC-gamma            | 19  | 76 |
| CaMKII_gamm<br>a     | 17 | 73 | IGF1R                  | 33  | 89  | PKC-theta            | 23  | 83 |
| Casein kinase<br>1g2 | -1 | 16 | IKBKE (IKK<br>epsilon) | 23  | 85  | PKCz                 | -2  | 12 |
| CDK1/Cycline<br>B1   | -5 | 3  | IKK-beta               | 60  | 98  | PKD1                 | -1  | 16 |
| CDK2                 | 5  | 43 | INSR                   | 32  | 87  | PKD2                 | 12  | 68 |
| CDK3                 | -5 | 3  | IRAK4                  | 21  | 83  | PKD3                 | -4  | 5  |
| CDK5/p25             | -4 | 4  | ITK                    | 5   | 45  | PKG1-beta            | 0   | 18 |
| CHK1                 | 12 | 66 | JAK2                   | 79  | 100 | PKGa                 | 2   | 21 |
| CHK2                 | 17 | 71 | KDR                    | 4   | 32  | PRAK                 | 10  | 63 |
| CK1d                 | 0  | 18 | KIT                    | -7  | 1   | PRKCI<br>(PKC-iota ) | 1   | 20 |
| CK1-epsilon          | -1 | 16 | KIT[T670I]             | -74 | -45 | PRKX                 | 1   | 20 |
| CK1g3<br>(CSNK1G3)   | -3 | 8  | LCK                    | 18  | 76  | PYK2                 | 29  | 86 |
| CK1-gamma1           | -1 | 16 | LOK                    | 59  | 97  | RET                  | 49  | 92 |
| CLK2                 | 1  | 20 | LTK                    | 18  | 76  | Ret (V804L)          | -12 | -5 |
| c-Raf                | -1 | 15 | LYN                    | 40  | 91  | RET Y791F            | -9  | -2 |
| CSNK1A1              | -2 | 11 | LYNB                   | 50  | 92  | ROCK1                | 15  | 69 |
| c-TAK1               | -7 | 1  | MAPKAPK2               | 9   | 59  | ROCK2                | 25  | 86 |
| DAPK1                | 4  | 36 | MAPKAPK3               | 7   | 52  | ROS (ROS1)           | 54  | 94 |
| DCAMKL1              | -4 | 6  | MARK1                  | 4   | 35  | RSK1                 | 3   | 28 |
| DCAMKL2              | -6 | 2  | MARK2                  | -3  | 9   | RSK2                 | 3   | 31 |
| DDR2                 | -6 | 2  | MARK4                  | 8   | 55  | RSK3                 | 9   | 56 |
| DYRK1a               | -5 | 3  | MELK                   | -2  | 13  | RSK4                 | 4   | 34 |
| DYRK1B               | 5  | 40 | Mer                    | 32  | 87  | SGK1                 | 8   | 55 |
| DYRK3                | 0  | 20 | MET                    | 5   | 43  | SGK2                 | 6   | 47 |

|                             |     |     |                 |     |    |              |    |    |
|-----------------------------|-----|-----|-----------------|-----|----|--------------|----|----|
| DYRK4                       | 2   | 27  | MET<br>M1250T   | -10 | -2 | SGK3         | 11 | 64 |
| EGFR                        | -3  | 9   | MINK            | 16  | 70 | SRC          | 39 | 90 |
| EGFR (ErbB1)<br>T790M L858R | -8  | 0   | MNK1<br>(MKNK1) | 16  | 70 | SRM (SRMS)   | -4 | 6  |
| EGFR(T790M)                 | -33 | -34 | MSK1            | 0   | 18 | SYK          | 99 | 93 |
| EPHA1                       | 11  | 66  | MSK2            | -5  | 3  | TEC          | -5 | 2  |
| EPHA2                       | 5   | 39  | MST1            | 64  | 99 | TRKC (NTRK3) | 13 | 69 |
| EPHA3                       | 7   | 49  | MST1R           | 2   | 21 | TSSK1        | 58 | 97 |
| EPHA4                       | 2   | 22  | MST2            | 20  | 78 | TSSK2        | 20 | 81 |
| EPHA5                       | 5   | 38  | MST3<br>(STK24) | 3   | 30 | TXK          | -4 | 6  |
| EPHA8                       | 5   | 42  | NEK1            | -4  | 5  | TYRO3        | 7  | 53 |
| EPHB1                       | 4   | 32  | NEK2            | -4  | 7  | Yes          | 32 | 87 |
| EPHB2                       | 5   | 43  | NTRK2<br>(TRKB) | 13  | 69 | ZIPK (DAPK3) | 72 | 99 |

**Table S2. Off-target receptor binding assays.**

| Receptor                                      | TAS05567 %<br>inh at 10 $\mu$ M | Receptor                          | TAS05567 %<br>inh at 10 $\mu$ M | Receptor                                              | TAS05567 %<br>inh at 10 $\mu$ M |
|-----------------------------------------------|---------------------------------|-----------------------------------|---------------------------------|-------------------------------------------------------|---------------------------------|
| Adenosine A1                                  | 75                              | Epidermal Growth<br>Factor        | -19                             | Neuropeptide Y Y2                                     | 4                               |
| Adenosine A2A                                 | 2                               | Estrogen ERalpha                  | 1                               | Nicotinic<br>Acetylcholine                            | -10                             |
| Adenosine A3                                  | 5                               | Transporter, GABA                 | 15                              | Nicotinic<br>Acetylcholine<br>Alpha1,<br>Bungarotoxin | 0                               |
| Adrenergic alpha1A                            | 12                              | GABAA, Muscimol,<br>Central       | -4                              | Opiate delta1 (OP1,<br>DOP)                           | 0                               |
| Adrenergic alpha1B                            | 7                               | GABAA,<br>Flunitrazepam, Central  | 24                              | Opiate kappa (OP2,<br>KOP)                            | 11                              |
| Adrenergic alpha1D                            | 10                              | GABAB1A                           | -3                              | Opiate mu (OP3,<br>MOP)                               | 9                               |
| Adrenergic alpha2A                            | -7                              | Glucocorticoid                    | 9                               | Phorbol Ester                                         | -9                              |
| Adrenergic beta1                              | -5                              | Glutamate, Kainate                | 8                               | Platelet Activating<br>Factor (PAF)                   | -10                             |
| Adrenergic beta2                              | 15                              | Glutamate, NMDA,<br>Agonism       | 3                               | Potassium Channel<br>[KATP]                           | -3                              |
| Transporter,<br>Norepinephrine                | 12                              | Glutamate, NMDA,<br>Glycine       | 4                               | Potassium Channel<br>hERG                             | 26                              |
| Bradykinin B1                                 | 15                              | Glutamate, NMDA,<br>Phencyclidine | -3                              | Prostanoid EP4                                        | -2                              |
| Bradykinin B2                                 | -3                              | Histamine H1                      | -7                              | Purinergic P2X                                        | 5                               |
| Calcium Channel<br>L-Type,<br>Benzothiazepine | 15                              | Histamine H2                      | 4                               | Purinergic P2Y                                        | 0                               |
| Calcium Channel<br>L-Type,<br>Dihydropyridine | 28                              | Histamine H3                      | 8                               | Rolipram                                              | 34                              |
| Calcium Channel<br>N-Type                     | 5                               | Imidazoline I2,<br>Central        | 12                              | Serotonin<br>(5-Hydroxytryptami<br>ne) 5-HT1A         | -8                              |

|                          |    |                                  |     |                                                           |     |
|--------------------------|----|----------------------------------|-----|-----------------------------------------------------------|-----|
| Cannabinoid CB1          | 6  | Interleukin IL-1                 | -10 | Serotonin<br>(5-Hydroxytryptamine) 5-HT2B                 | -9  |
| Dopamine D1              | -1 | Leukotriene, Cysteinyl<br>CysLT1 | 11  | Serotonin<br>(5-Hydroxytryptamine) 5-HT3                  | -13 |
| Dopamine D2S             | -5 | Melatonin MT1                    | 4   | Transporter,<br>Serotonin<br>(5-Hydroxytryptamine) (SERT) | -4  |
| Dopamine D3              | 3  | Muscarinic M1                    | 0   | Sigma1                                                    | -2  |
| Dopamine D4.2            | -1 | Muscarinic M2                    | -1  | Sodium Channel,<br>Site 2                                 | 30  |
| Transporter,<br>Dopamine | 24 | Muscarinic M3                    | -7  | Androgen<br>(Testosterone) AR                             | -8  |
| Endothelin ETA           | 11 | Tachykinin NK1                   | 6   | Thyroid Hormone                                           | 3   |
| Endothelin ETB           | 0  | Neuropeptide Y Y1                | -1  |                                                           |     |

Off-target effects of 10  $\mu$ M TAS05567 were assessed using the LeadPrifilingScreen commercial assay. Results that show an inhibition or stimulation >50% are considered to represent significant effects on the test compound.

**Table S3. Plasma protein binding of TAS05567.**

| Species | Unbound fraction (%) |
|---------|----------------------|
|         | TAS05567             |
| Mouse   | 15.4 ± 0.5           |
| Rat     | 18.3 ± 1.1           |
| Human   | 21.9 ± 0.1           |

TAS05567 was tested at a final concentration of 1  $\mu$ M in mouse, rat, and human plasma.

An aliquot of plasma containing TAS05567 was in the well of equilibrium dialysis device. The plate containing plasma and buffer was equilibrated at 37°C for 6 h, with constant shaking at 80 rpm on an orbital shaker. Samples were collected and precipitated using organic solvents. All samples were centrifuged at 850g for 5 min at 4°C, and then were analyzed by liquid chromatography–tandem mass spectrometry.

Data are presented as mean  $\pm$  SD (n = 3).

## Additional file 1: Figure S1

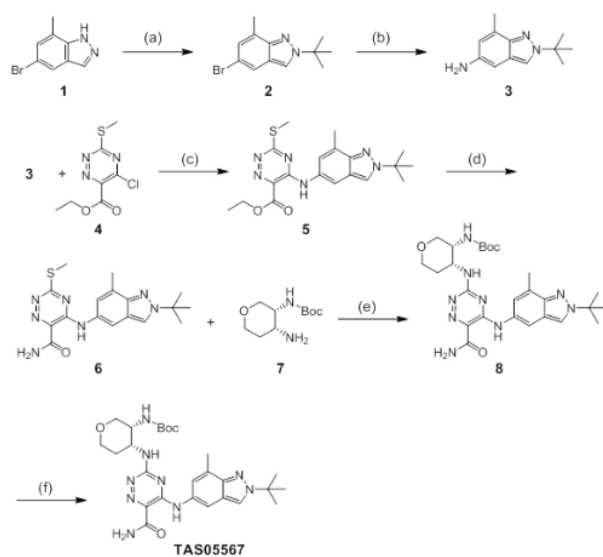

Supplemental Figure 1. Scheme of the design and synthesis of TAS05567.



**Additional file 1: Figure S2**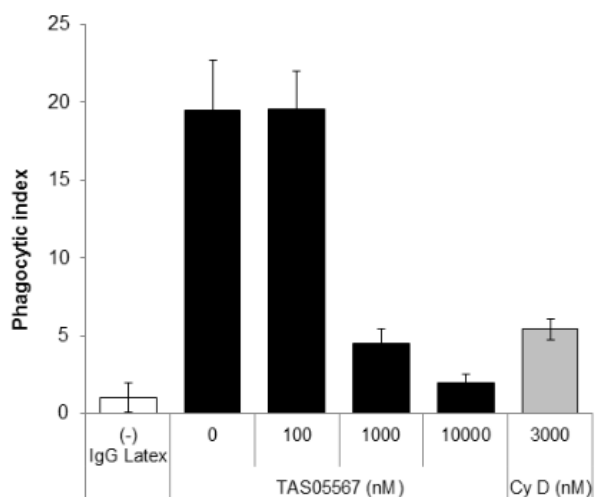**Supplemental Figure 2. TAS05567 inhibits FcγR-mediated phagocytosis in**

**macrophages.** RAW264.7 cells were pretreated with TAS05567 or cytochalasin D for 1 h, followed by incubation with latex beads coated with FITC-labeled IgG (1:500) for 4 h. The cells were collected and analyzed by flow cytometry. Data were obtained from triplicate analyses and are presented as mean  $\pm$  SD. Cy D indicates cytochalasin D.

## Supplementation Experimental Procedure

### Synthetic procedures and characterization data for the synthesis of TAS05567

Reagents and Conditions:

(a) AcOtBu, MeSO<sub>3</sub>H, toluene, 80 °C, 28 h; (b) 28% NH<sub>3</sub> aq., Cu<sub>2</sub>O, NMP, 95 °C, 14 h;  
(c) (i) chlorine, chloroform, 0 °C (ii) iPr<sub>2</sub>NEt, THF, 0 °C; (d) DMA, iPr<sub>2</sub>NEt, room temperature, 6 h; (e) 8M NH<sub>3</sub>-MeOH, room temperature, 6 days; (f) TFA, room temperature, 1.5 h

(a) 5-bromo-2-(tert-butyl)-7-methyl-2H-indazole (compound 2)

tert-butyl acetate (405 ml) and methanesulfonic acid (19.5 ml, 300 mmol) were added to a solution of 5-bromo-7-methyl-1H-indazole (compound 1, 63.3 g) in toluene (190 ml) at room temperature. The mixture was stirred at 60 °C for 1 day and at 70 °C for 2 days. Water was added, followed by extraction with toluene. The organic layer was washed with water, and dried over anhydrous sodium sulfate. The solvent was distilled off under reduced pressure. The resulting residue was purified by silica gel column chromatography (hexane/ethyl acetate) to obtain compound 2 as pale red oil (69.7 g, 87%).

(b) 2-(tert-butyl)-7-methyl-2H-indazol-5-amine (compound 3)

A mixture of compound 2 (23.77g, 88.97 mmol) and copper (I) oxide (1.27g, 8.88 mmol) in 1-methyl-2-pyrrolidone (120 mL) and concentrated ammonia solution (120 ml) in stainless steel sealed tube was heated at 95 °C (internal temperature) for 14 h.

The mixture was allowed to cool to room temperature and then partitioned between ethyl acetate and water. The organic layer was washed with water and brine, dried over  $\text{Na}_2\text{SO}_4$  and evaporated in vacuo. To the residue was added diisopropyl ether and the precipitate was collected by filtration and dried over at 50 °C. Compound 3 (7.98 g, 44%) was obtained as white solid. The filtrate was purified by flash column chromatography on silicagel to afford the 2nd crop of compound 3 (5.53 g, 31%)

(c) ethyl  
5-((2-(tert-butyl)-7-methyl-2H-indazol-5-yl)amino)-3-chloro-1,2,4-triazine-6-carboxylate (compound 5)

To the mixture of ethyl 5-chloro-3-methylsulfanyl-1,2,4-triazine-6-carboxylate (5.95 g, 25.5 mmol) in chloroform (60 ml) was added chlorine gas at 0 °C. After the starting material was disappeared in LCMS, the mixture was concentrated in vacuo. The residue was diluted by THF (100 mL) and cooled at 0 °C.

To the mixture was added N,N-diisopropylethylamine, followed by a solution of compound 3 (5.69 g, 28 mmol) in THF (50 ml). The mixture was quenched by addition

of 10% H<sub>3</sub>PO<sub>4</sub> aqueous solution, and the mixture was extracted by ethyl acetate. The organic layer was washed with saturated aqueous NaHCO<sub>3</sub> solution and brine, dried over Na<sub>2</sub>SO<sub>4</sub> and evaporated in vacuo. To the residue was added diisopropyl ether and the precipitate was collected by filtration and dried over at 50 °C. Compound 5 (6.78 g, 69%) was obtained as pale yellow solid. The filtrate was purified by flash column chromatography on silicagel to afford the 2nd crop of compound 5 (0.97 g, 10%)

(d) ethyl  
3-(((3R,4R)-3-((tert-butoxycarbonyl)amino)tetrahydro-2H-pyran-4-yl)amino)-5-((2-(tert-butyl)-7-methyl-2H-indazol-5-yl)amino)-1,2,4-triazine-6-carboxylate (compound 7).

To a yellow suspension of compound 5 (35.0 g , 90 mmol) in dimethylacetamide (100 ml), a solution of compound 6 (21.4 g, 98.9 mmol) in dimethylacetamide (80 ml) and diisopropylethylamine (15.1 g, 117 mmol) were added at room temperature. The dark red reaction mixture was stirred for 6 h. After water (300 ml) was added, reaction mixture was stirred for 3 h. Precipitate was collected by filtration and washed with water, and dried over at 50 °C. A crude material was added to ethanol (350 ml). The mixture was heated, and then water (350 ml) was added to the mixture. The mixture was stirred for 3 h at room temperature, then precipitate was collected by filtration and washed with 50% aqueous ethanol, and dried over at 50 °C to afford compound 7 (47.7

g, 93.2%) as a yellow solid.

(e) tert-butyl

((3R,4R)-4-((5-((2-(tert-butyl)-7-methyl-2H-indazol-5-yl)amino)-6-carbamoyl-1,2,4-triazin-3-yl)amino)tetrahydro-2H-pyran-3-yl)carbamate (compound 8)

8 M ammonia in methanol solution (500 ml, 4.00 mol) was added to Compound 7 (47.2 g, 83.0 mmol), and the mixture was stirred for 6 days at room temperature. Methanol was removed under reduced pressure, and 30% methanol was added to the residue, and the mixture was stirred for 2 h. Precipitate was collected by filtration and washed with 30% methanol aqueous solution, and dried over at 50 °C to afford a compound 8 (44.1 g, 98.5 %) as a pale yellow solid.

(f)

3-(((3R,4R)-3-aminotetrahydro-2H-pyran-4-yl)amino)-5-((2-(tert-butyl)-7-methyl-2H-indazol-5-yl)amino)-1,2,4-triazine-6-carboxamide (TAS05567)

Compound 8 (40.4 g, 74.9 mmol) was added to trifluoroacetic acid (170 ml) and the mixture was stirred for 1.5 h at room temperature. After removal of solvent under reduced pressure, water was added to the residue, and then the mixture was basified (approximately pH 10) with conc. ammonia solution at 0 °C. Precipitate was collected by filtration, washed with water, and dried in vacuo at 50 °C to give TAS05567 as

yellow solid (32.4 g, 98.5 %).

<sup>1</sup>H-NMR (CDCl<sub>3</sub>/CD<sub>3</sub>OD=1/1) δ: 8.20-7.84 (1H, m), 8.11 (1H, s), 7.23-7.03 (1H, m), 4.30-4.07 (1H, m), 4.01 (1H, d, J = 11.0 Hz), 3.87 (1H, d, J = 12.1 Hz), 3.64 (1H, q, J = 7.0 Hz), 3.58-3.47 (1H, m), 3.16 (1H, s), 2.63 (3H, s), 1.98-1.88 (1H, m), 1.87-1.81 (1H, m), 1.77 (9H, s).

ESI-MS m/z 440 [M+H<sup>+</sup>].

#### **Off-target receptor binding assays**

TAS05567 was tested at 10 μM for orthosteric radioligand displacement against a panel of 68 primary molecular targets, such as G-protein-coupled receptors, ion channels, and transporters, to characterize its specificity using the LeadPrifilingScreen commercial assay (Eurofins Panlabs Taiwan, Taipei, Taiwan). Results that show an inhibition or stimulation >50% were considered to represent significant effects on the test compound.

#### **Plasma protein binding**

TAS05567 (in 50:50 acetonitrile/water) was tested at a final concentration of 1 μM in mouse, rat (Charles River Laboratories Japan, Yokohama, Japan), and human plasma (Biopredic, Rennes, France). An aliquot of 150 μl plasma containing TAS05567 was in

donor side of the well of 96-well micro-equilibrium dialysis device (HTD 96b, HTDialysis, CT, USA). An aliquot of 150  $\mu$ l PBS was added in reservoir side of the same device. The plate containing plasma and buffer was equilibrated at 37°C for 6 h, with constant shaking at 80 rpm on an orbital shaker. Samples were collected from respective sides after 6 h. All samples were centrifuged at 850g for 5 min at 4°C, and then were analyzed by liquid chromatography–tandem mass spectrometry. Data are presented as mean  $\pm$  SD (n = 3).

#### **Fc $\gamma$ RI-mediated Phagocytosis Assay**

Phagocytic ability was evaluated by measuring the amount of uptake of latex beads coated with FITC-labeled IgG into cells by a phagocytosis assay kit (Cayman Chemical, Ann Arbor, MI, USA) according to the instruction manual. Briefly, RAW264.7 cells (ATCC TIB-71) were seeded in 6-well plates ( $1 \times 10^6$  cells/well) in DMEM containing 5% FBS overnight at 37°C to allow adherence to the plate. On the next day, the latex beads were added directly to the culture medium at a dilution of 1:500 and incubated at 37°C for 4 h. The cells were collected and analyzed by flow cytometry (BD Biosciences, San Jose, CA, USA).
